# Supplementary material for: High-throughput single-molecule telomere characterization
Source: HighWire-hosted journal article supplement (doi:10.1101/gr.222422.117), 2017-10-12
Supplement: Supplemental_Table_S1.docx [file Supplemental_Table_S1.docx]

Table S1. Summary of single telomere lengths for all chromosome arms.

| **Average single telomere lengths in kb: Mean ± Std (number of telomeres) and the number of short telomeres <100 bp and <500 bp** | | | | | | | | | | | | | | | |
| --- | --- | --- | --- | --- | --- | --- | --- | --- | --- | --- | --- | --- | --- | --- | --- |
|  | **IMR90-PD17** | | | **IMR90-PD45** | | | **IMR90-senescence** | | | **UMUC3** | | | **LNCaP** | | |
| **Chr-parm** | **Average length** | **<100bp** | **<500bp** | **Average length** | **<100bp** | **<500bp** | **Average length** | **<100bp** | **<500bp** | **Average length** | **<100bp** | **<500bp** | **Average length** | **<100bp** | **<500bp** |
| **1p** | **13.2 ± 5.4 (24)** | **0** | **0** | **6.7 ± 4.5 (10)** | **0** | **0** | **nd** | **nd** | **nd** | **3.7 ± 3.1 (30)** | **0** | **1** | **nd** | **0** | **0** |
| **2p** | **8.4 ± 5.6 (30)** | **0** | **0** | **5.7 ± 4.6 (37)** | **0** | **0** | **3.2 ±2.1 (30)** | **0** | **1** | **2.4 ± 2.0 (30)** | **0** | **3** | **3.1 ± 1.2 (30)** | **0** | **0** |
| **3p** | **8.9 ± 4.4 (31)** | **0** | **0** | **4.4 ± 3.1 (20)** | **0** | **0** | **4.9 ± 2.7 (31)** | **0** | **0** | **5.4 ± 3.5 (31)** | **0** | **0** | **3.5 ± 1.7 (31)** | **0** | **1** |
| **4p** | **8.8 ± 4.0 (23)** | **0** | **0** | **5.4 ± 4.4 (28)** | **0** | **0** | **4.8 ± 2.8 (34)** | **1** | **3** | **3.7 ± 2.8 (30)** | **0** | **0** | **3.3 ± 1.7 (30)** | **0** | **1** |
| **5p** | **7.9 ± 3.1 (17)** | **0** | **0** | **3.1 ± 2.7 (28)** | **0** | **1** | **3.3 ± 2.4 (27)** | **2** | **3** | **1.8 ± 1.4 (21)** | **0** | **1** | **3.4 ± 1.5 (28)** | **0** | **0** |
| **6p(haplotype1)** | **7.2 ± 4.4 (13)** | **0** | **0** | **2.1 ± 2.0 (14)** | **0** | **0** | **3.2 ± 1.5 (22)** | **0** | **0** | **2.9 ± 2.0 (20)** | **1** | **2** | **4.2 ± 2.0 (10)** | **0** | **0** |
| **6p(haplotype2)** | **5.6 ± 3.8 (21)** | **0** | **0** | **1.6 ± 1.4 (20)** | **1** | **1** | **nd** | **nd** | **nd** | **1.2 ± 0.8 (12)** | **1** | **2** | **3.2 ± 2.1(20)** | **0** | **2** |
| **7p** | **6.2± 4.0 (27)** | **0** | **0** | **4.7 ± 3.1 (32)** | **1** | **1** | **nd** | **nd** | **nd** | **nd** | **0** | **0** | **2.5± 1.0 (32)** | **0** | **1** |
| **8p** | **8.9 ± 6.8 (33)** | **0** | **0** | **2.1 ± 1.7 (9)** | **0** | **1** | **2.4 ± 2.1 (31)** | **0** | **3** | **3.6 ± 3.2 (30)** | **0** | **1** | **2.3 ± 1.3(32)** | **0** | **0** |
| **9p** | **3.6 ± 3.0 (34)** | **0** | **0** | **3.3 ± 2.8 (33)** | **0** | **1** | **4.4 ± 2.2 (32)** | **1** | **3** | **1.7 ± 1.5 (30)** | **3** | **12** | **3.4 ± 2.9 (32)** | **0** | **0** |
| **10p** | **8.9 ± 5.1 (22)** | **0** | **0** | **nd** | **nd** | **nd** | **4.0 ± 2.8 (29)** | **1** | **3** | **4.0 ± 2.6 (39)** | **0** | **0** | **2.3± 1.6 (26)** | **0** | **2** |
| **11p** | **6.4 ± 4.2 (30)** | **0** | **0** | **3.8 ± 2.7 (27)** | **0** | **0** | **3.2 ±2.1 (32)** | **2** | **3** | **4.8 ± 4.1 (12)** | **0** | **0** | **2.6 ± 1.0 (25)** | **0** | **0** |
| **12p** | **5.4 ± 2.9 (21)** | **0** | **0** | **2.8 ± 2.7 (32)** | **0** | **1** | **3.4 ± 2.3 (31)** | **0** | **1** | **3.7 ± 3.2 (30)** | **0** | **0** | **3.0 ±2.3 (30)** | **0** | **0** |
| **13p** | **nr** | **nr** | **nr** | **nr** | **nr** | **nr** | **nr** | **nr** | **nr** | **nr** | **nr** | **nr** | **nr** | **nr** | **nr** |
| **14p** | **nr** | **nr** | **nr** | **nr** | **nr** | **nr** | **nr** | **nr** | **nr** | **nr** | **nr** | **nr** | **nr** | **nr** | **nr** |
| **15p** | **nr** | **nr** | **nr** | **nr** | **nr** | **nr** | **nr** | **nr** | **nr** | **nr** | **nr** | **nr** | **nr** | **nr** | **nr** |
| **16p** | **INP** | **INP** | **INP** | **INP** | **INP** | **INP** | **INP** | **INP** | **INP** | **INP** | **INP** | **INP** | **4.0± 2.4 (34)** | **0** | **0** |
| **17p** | **INP** | **INP** | **INP** | **INP** | **INP** | **INP** | **INP** | **INP** | **INP** | **INP** | **INP** | **INP** | **nd** | **nd** | **nd** |
| **18p** | **7.5 ± 3.2 (26)** | **0** | **0** | **nd** | **0** | **0** | **3.9 ± 2.4 (30)** | **1** | **1** | **3.5 ± 3.1 (20)** | **0** | **2** | **2.6 ± 1.5 (28)** | **0** | **0** |
| **19p** | **6.9 ±4.7 (23)** | **0** | **0** | **5.4 ± 4.2 (18)** | **0** | **0** | **3.0 ± 2.1 (31)** | **0** | **0** | **2.1 ± 0.8 (30)** | **0** | **0** | **2.7 ± 1.5 (31)** | **0** | **1** |
| **20p** | **6.7 ± 5.3 (23)** | **0** | **0** | **4.4 ± 2.0 (17)** | **0** | **0** | **5.4 ± 3.7 (23)** | **0** | **0** | **1.6 ± 1.1 (23)** | **0** | **2** | **1.8 ± 0.9 (12)** | **0** | **1** |
| **21p** | **nr** | **nr** | **nr** | **nr** | **nr** | **nr** | **nr** | **nr** | **nr** | **nr** | **nr** | **nr** | **nr** | **nr** | **nr** |
| **22p** | **nr** | **nr** | **nr** | **nr** | **nr** | **nr** | **nr** | **nr** | **nr** | **nr** | **nr** | **nr** | **nr** | **nr** | **nr** |
| **Xp/Yp** | **nr** | **nr** | **nr** | **nr** | **nr** | **nr** | **nr** | **nr** | **nr** | **nr** | **nr** | **nr** | **nr** | **nr** | **nr** |
| **Chr-qarm** |
| **1q** | **7.4 ± 3.9 (25)** | **0** | **0** | **3.6 ± 3.4 (25)** | **0** | **1** | **4.8 ± 2.1(31)** | **0** | **0** | **3.0 ± 2.1(25)** | **0** | **0** | **3.2 ± 1.3(30)** | **0** | **0** |
| **2q(haplotype1)** | **8.2 ± 3.5 (12)** | **0** | **0** | **9.3 ± 4.5 (13)** | **0** | **0** | **5.5 ± 4.8(24)** | **0** | **0** | **2.4 ± 2.0(30)** | **0** | **0** | **3.3 ± 2.0(30)** | **0** | **1** |
| **2q(haplotype2)** | **7.2 ± 4.0 (19)** | **0** | **0** | **7.4 ± 6.1 (16)** | **1** | **1** | **nd** | **nd** | **nd** | **N/A** | **0** | **0** | **N/A** | **0** | **0** |
| **3q** | **3.9 ± 3.0 (23)** | **0** | **0** | **nd** | **nd** | **nd** | **4.8 ± 3.4(21)** | **2** | **3** | **4.5 ± 3.3(33)** | **0** | **0** | **3.6 ± 2.1(30)** | **0** | **0** |
| **4q** | **nd** | **nd** | **nd** | **nd** | **nd** | **nd** | **nd** | **nd** | **nd** | **4.0 ± 3.3(10)** | **0** | **0** | **nd** | **0** | **0** |
| **5q(haplotype1)** | **7.1 ± 3.9 (30)** | **0** | **0** | **3.8 ± 3.4 (28)** | **0** | **1** | **3.8 ± 2.2(35)** | **0** | **1** | **2.9 ± 1.9(30)** | **0** | **1** | **4.5 ± 1.9(27)** | **0** | **0** |
| **5q(haplotype2)** | **N/A** | **N/A** | **N/A** | **N/A** | **N/A** | **N/A** | **N/A** | **N/A** | **N/A** | **N/A** | **N/A** | **N/A** | **4.1 ± 1.8(22)** | **0** | **0** |
| **6q** | **5.6 ± 3.8 (22)** | **0** | **0** | **nd** | **nd** | **nd** | **4.2± 2.8(27)** | **1** | **1** | **4.5 ± 3.3(24)** | **0** | **0** | **4.1 ± 1.6(24)** | **0** | **0** |
| **7q** | **8.3 ± 4.4 (30)** | **0** | **0** | **6.2 ± 5.0 (32)** | **0** | **1** | **5.1 ± 3.0(30)** | **0** | **0** | **2.7 ± 2.0(30)** | **0** | **0** | **2.7 ± 1.4(30)** | **0** | **0** |
| **8q** | **5.6 ± 2.8 (24)** | **0** | **0** | **3.9 ± 3.3 (20)** | **0** | **1** | **2.6 ± 2.5(31)** | **8** | **8** | **1.0 ± 0.5(31)** | **3** | **15** | **2.2 ± 1.6(31)** | **3** | **5** |
| **9q** | **6.5 ± 3.9 (24)** | **0** | **0** | **5.5 ± 3.9 (16)** | **0** | **1** | **4.4 ± 2.1(31)** | **0** | **3** | **1.9 ± 1.0(30)** | **0** | **0** | **3.3± 1.5(26)** | **0** | **0** |
| **10q** | **nd** | **nd** | **nd** | **nd** | **nd** | **nd** | **nd** | **nd** | **nd** | **6.0 ± 3.4(23)** | **0** | **0** | **2.0± 0.8(26)** | **0** | **0** |
| **11q** | **7.2 ± 3.9 (38)** | **0** | **0** | **6.7 ± 5.9 (35)** | **0** | **0** | **4.5 ± 2.0(20)** | **0** | **0** | **3.5 ± 3.4(30)** | **0** | **3** | **2.2 ± 1.5(31)** | **0** | **0** |
| **12q** | **7.4 ± 5.0 (28)** | **0** | **0** | **2.7 ± 2.3 (33)** | **1** | **2** | **3.8 ± 2.8(31)** | **3** | **3** | **5.8 ± 3.8(31)** | **0** | **0** | **3.2 ± 1.9(30)** | **0** | **1** |
| **13q** | **7.7 ± 3.8 (24)** | **0** | **0** | **3.6 ± 2.6 (22)** | **0** | **0** | **5.1 ± 3.1(30)** | **0** | **0** | **2.5 ± 2.4(30)** | **0** | **1** | **3.0± 1.9(26)** | **1** | **0** |
| **14q** | **8.6 ± 4.2 (15)** | **0** | **0** | **5.1 ± 3.2 (22)** | **0** | **0** | **3.0 ± 1.9(26)** | **3** | **7** | **1.9 ± 1.4(10)** | **0** | **1** | **3.9 ± 2.0(14)** | **0** | **0** |
| **15q** | **7.7 ± 4.3 (24)** | **0** | **0** | **3.2 ± 2.3 (30)** | **0** | **1** | **3.8 ± 2.3(29)** | **0** | **0** | **2.9 ± 2.2(29)** | **0** | **3** | **2.8 ± 1.1(30)** | **0** | **0** |
| **16q(haplotype1)** | **5.3 ± 4.5 (14)** | **0** | **0** | **4.0 ± 3.5 (10)** | **1** | **1** | **nd** | **nd** | **nd** | **nd** | **nd** | **nd** | **3.5± 1.5(29)** | **0** | **0** |
| **16q(haplotype2)** | **N/A** | **N/A** | **N/A** | **N/A** | **N/A** | **N/A** | **N/A** | **nd** | **nd** | **nd** | **nd** | **nd** | **3.0± 1.5(22)** | **0** | **0** |
| **17q** | **6.7 ± 4.6 (24)** | **0** | **0** | **4.5 ± 3.3 (29)** | **0** | **0** | **4.7 ± 2.1(30)** | **0** | **1** | **nd** | **nd** | **nd** | **2.6 ± 1.0(31)** | **0** | **0** |
| **18q** | **7.2 ± 4.2 (27)** | **0** | **0** | **3.8 ± 3.2 (27)** | **0** | **0** | **4.8 ± 2.1(24)** | **0** | **0** | **3.0 ± 1.9(30)** | **0** | **2** | **4.1 ± 1.7(28)** | **0** | **0** |
| **19q** | **INP** | **INP** | **INP** | **INP** | **INP** | **INP** | **INP** | **INP** | **INP** | **INP** | **INP** | **INP** | **INP** | **INP** | **INP** |
| **20q** | **nd** | **0** | **0** | **nd** | **nd** | **nd** | **3.6 ± 1.6(16)** | **0** | **1** | **2.1 ± 2.0(30)** | **0** | **4** | **2.8 ± 1.4(30)** | **0** | **0** |
| **21q** | **7.1 ± 3.8 (29)** | **0** | **0** | **3.7 ± 2.7 (18)** | **0** | **1** | **3.6 ± 1.9(32)** | **0** | **0** | **3.2 ± 2.6(30)** | **0** | **1** | **3.9 ± 1.7(30)** | **0** | **0** |
| **22q** | **INP** | **INP** | **INP** | **INP** | **INP** | **INP** | **INP** | **INP** | **INP** | **INP** | **INP** | **INP** | **INP** | **INP** | **INP** |
| **Xq/Yq** | **7.3 ± 3.1 (13)** | **0** | **0** | **nr** | **nr** | **nr** | **7.0 ± 3.6 (21)** | **0** | **0** | **5.4 ± 4.1(15)** | **0** | **0** | **3.0 ± 1.2(30)** | **0** | **0** |
| **total** |  | **0** | **0** |  | **5** | **17** |  | **25** | **49** |  | **8** | **57** |  | **4** | **16** |

nd: no data, not enough molecules to measure the telomere length

N/A: homozygous

INP: inverted nick pair (INP) sites

nr: no reference sequences or significant gaps in the reference sequences
