# Supplementary figures and images for: High-throughput single-molecule telomere characterization
Source: PubMed Central journal article supplement — Genome Res. 2017 Nov;27(11):1904–15. doi: 10.1101/gr.222422.117 (PMC5668947; doi:10.1101/gr.222422.117), 2017-11

Figure S1A.

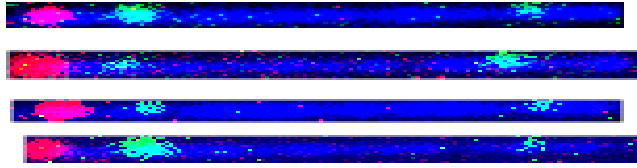

Figure S1B.

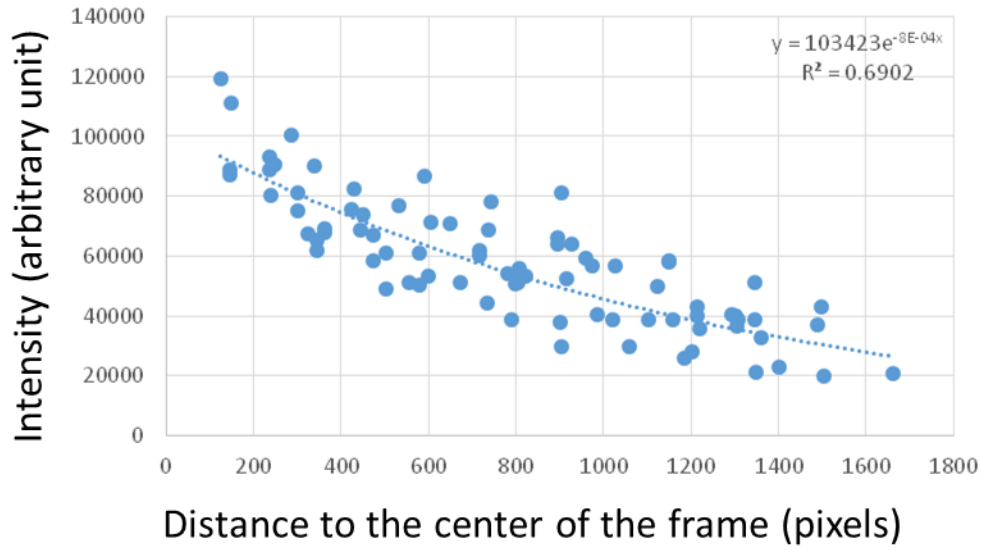

Figure S1C.

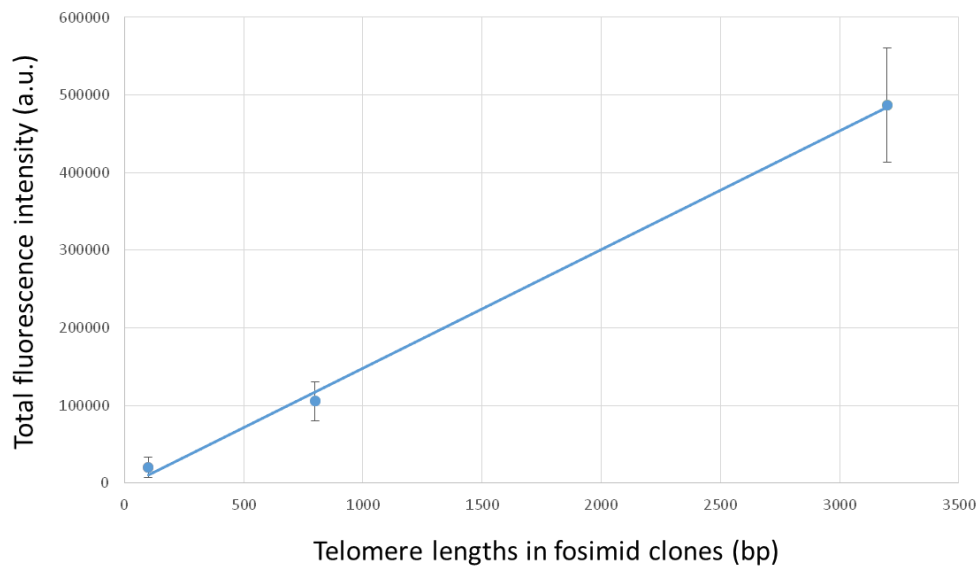

Supplement: supp_gr.222422.117_Supplemental_Figure1.pdf [file supp_gr.222422.117_Supplemental_Figure1.pdf]

Figure S2. 11q of UMUC3 with and without Cas9 telomere labeling.

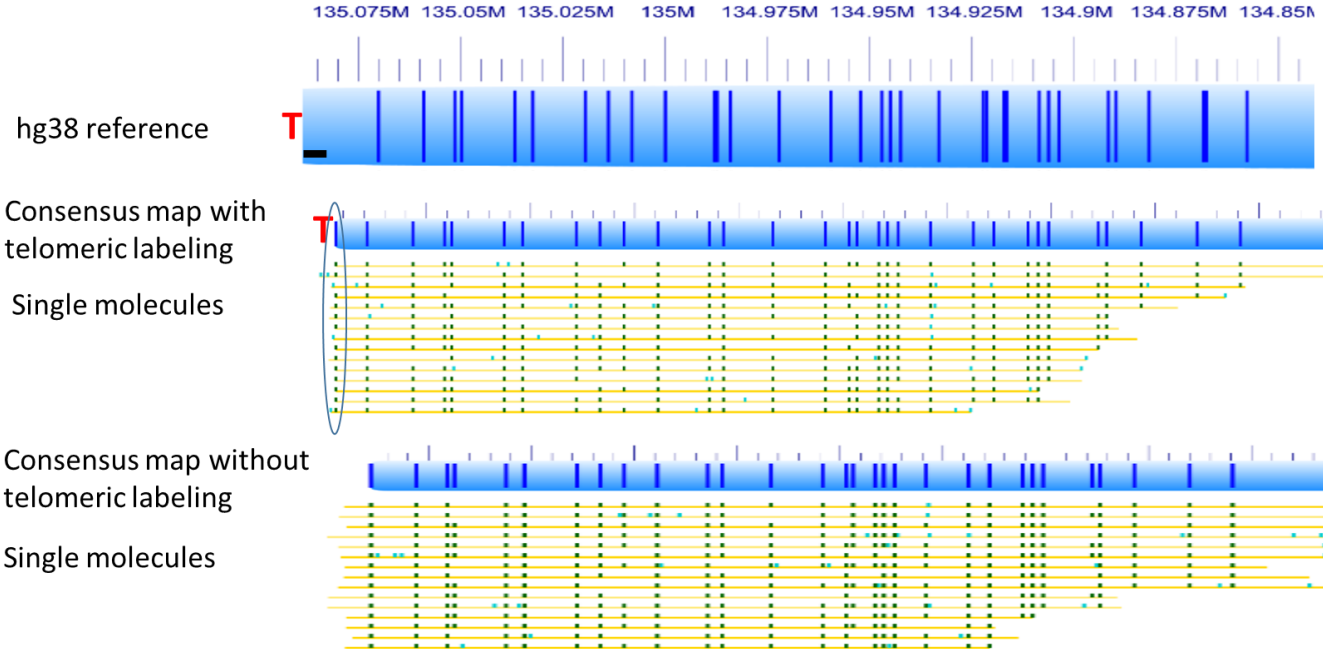

Supplement: supp_gr.222422.117_Supplemental_Figure2.pdf [file supp_gr.222422.117_Supplemental_Figure2.pdf]

Figure S3. 12p of LNCaP molecules for telomere length measurement.

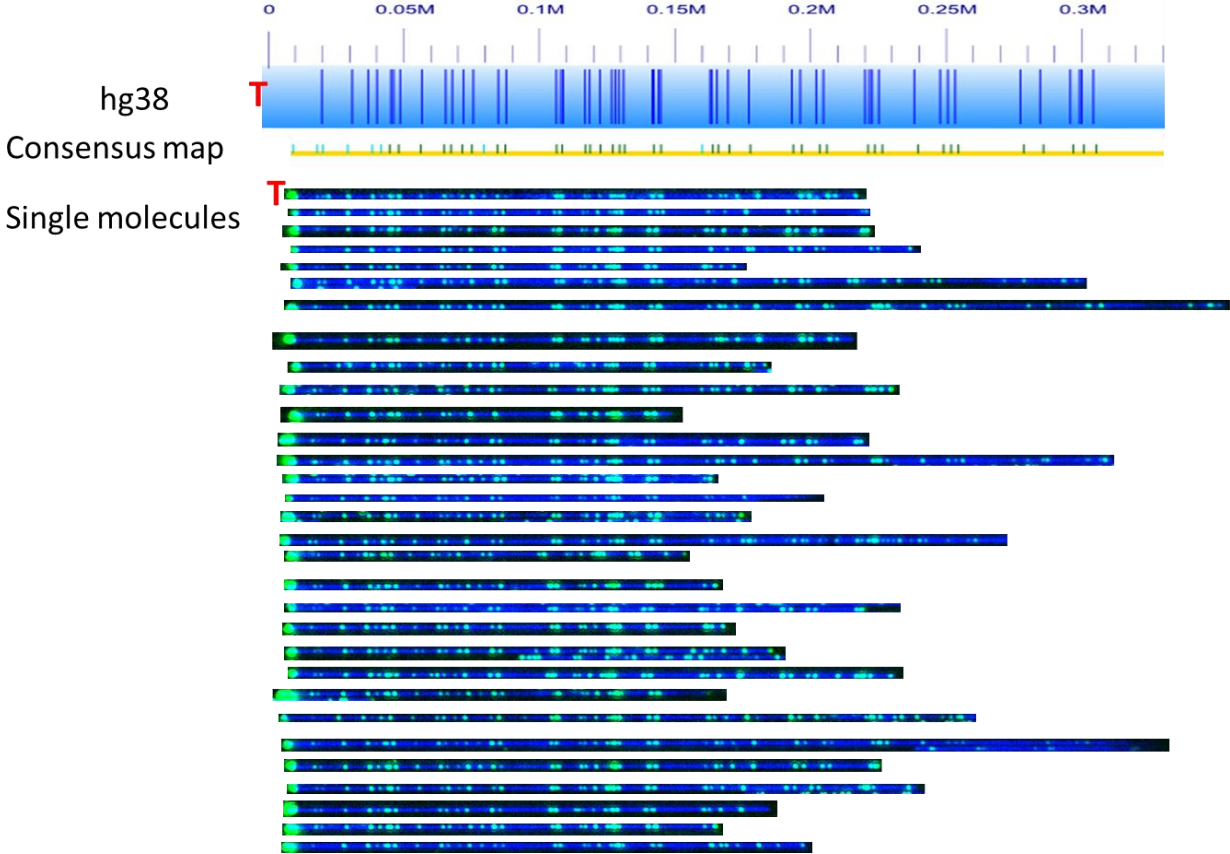

Supplement: supp_gr.222422.117_Supplemental_Figure3.pdf [file supp_gr.222422.117_Supplemental_Figure3.pdf]
